# Supplementary material
Source: bioRxiv or medRxiv preprint supplement (https://www.biorxiv.org/highwire/filestream/34570/field_highwire_adjunct_files/1/112227-2.pdf)
Supplement: Supplementary file [file 112227-2.pdf]

**3D views of multi-targets in fixed mouse hippocampal neuron cultures.** A movie was created using Imaris for 3D slicing views of the targets shown in Figure 2. Mouse hippocampal neurons were fixed using PFA and stained to target SynapsinI, vGAT, MAP2, pNFH, AlphaTubulin, AcetylTubulin, GFAP, and DAPI.
